# Supplementary material for: BALSA: integrated secondary analysis for whole-genome and whole-exome sequencing, accelerated by GPU
Source: PeerJ journal article supplement (doi:10.7717/peerj.421), 2014-06-03

# Comparing BALSAs to Individual callers

Indel

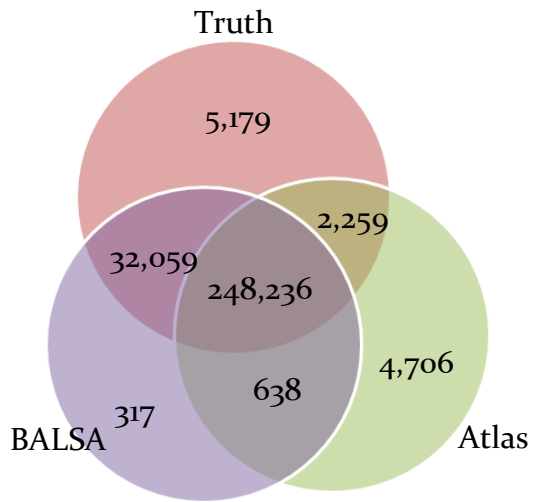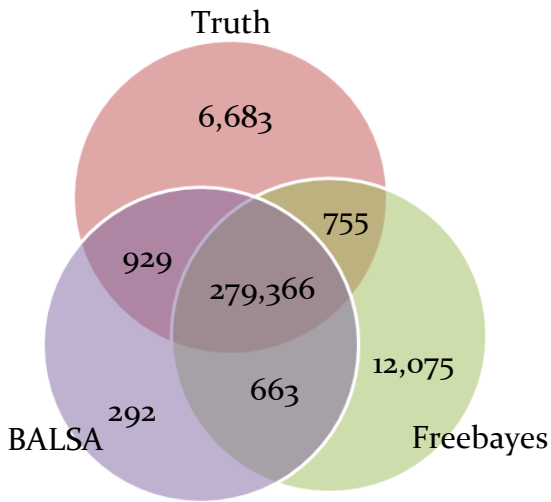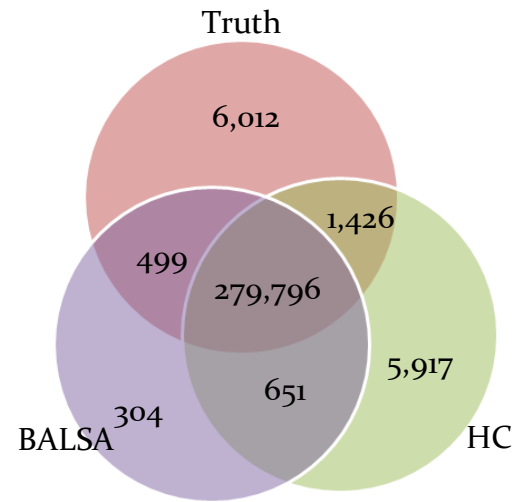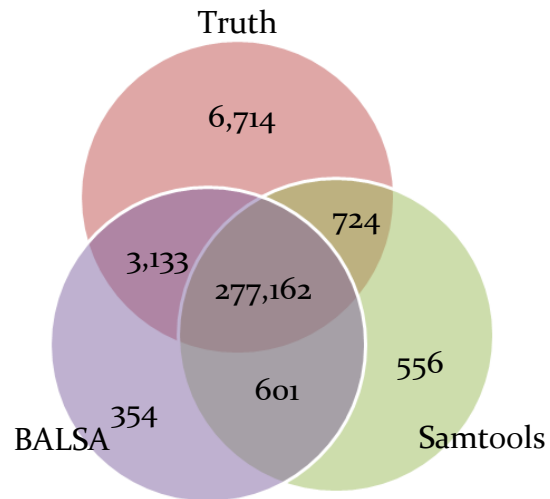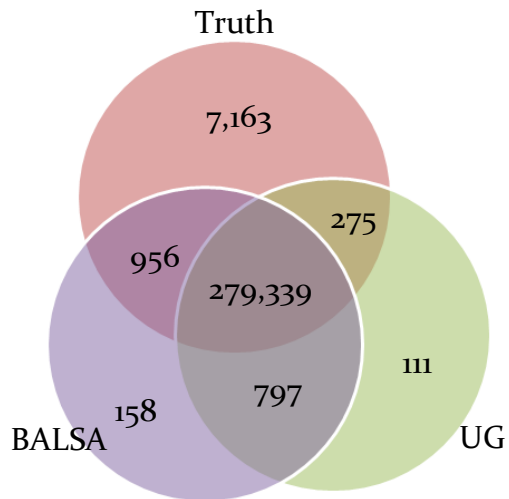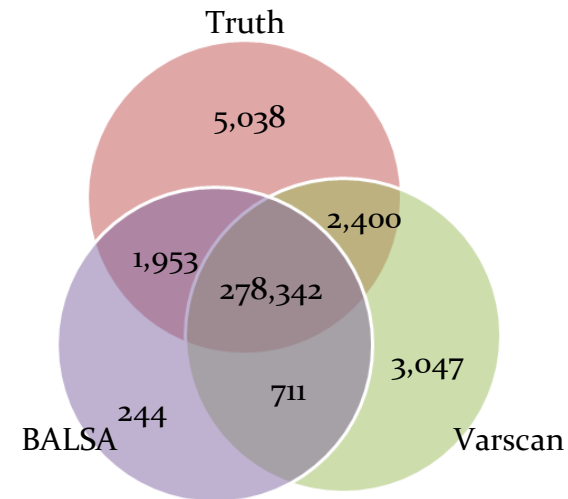

Supplement: Figure_S2.pdf [file Figure_S2.pdf]
